# Supplementary material for: Metal-regulated d10 coordination polymers constructed from bis(pyridyl)-bis(amide) ligands with different spacers as high-efficiency fluorescence sensors for identifying chlortetracycline and furaltadone
Source: Royal Society of Chemistry journal article supplement (doi:10.1039/d3nj01538f), 2023-01-01
Supplement: d3nj01538f1.pdf [file d3nj01538f1.pdf]

**Metal-regulated d<sup>10</sup> coordination polymers constructed from bis(pyridyl)-bis(amide) ligands with different spacers as high-efficiency fluorescence sensors for identifying chlortetracycline and furaltadone**

Jun Geng, Jiaxin Sun, Hongyan Lin\* and Xiuli Wang\*

*College of Chemistry and Materials Engineering, Professional Technology Innovation Center of Liaoning Province for Conversion Materials of Solar Cell, Bohai University, Jinzhou 121013, P. R. China*

***Section 1 Experimental section***

**I. Materials and general methods**

The reagents were obtained from commercial resources and used directly without further purification. The powder X-ray diffraction (PXRD) data were carried out by using a Rigaku Ultima IV diffractometer at room temperature. FT-IR spectra were collected on a Varian 640 FT-IR spectrometer with KBr pellets. The fluorescent spectra were recorded on a Hitachi F-4500 luminescence spectrometer. Fluorescence lifetime data was obtained on the FLS1000 transient steady-state fluorescence spectrometer. UV-vis absorption spectra were carried out on SP-1901. For the synthesis of CPs **1-3**, the autoclave was cooled to room temperature with cooling rate of 1 °C every 6 minutes and washed with ethanol, and the suitable crystals were manually picked from the precipitation.

**II. X-ray crystallography.**

Data collection was performed on a Bruker Smart APEX II diffractometer with K $\alpha$  ( $\lambda = 0.71073 \text{ \AA}$ ) by  $\theta$  and  $\omega$  scan mode at room temperature. The crystal structures of CPs **1-3** were solved by the direct method using the SHELXT program of the Olex 2 crystallographic software package and refined on  $F^2$  by full-matrix least-squares methods.<sup>1</sup> Anisotropic thermal parameters were utilized in all non-hydrogen atoms. CCDC are No. 2240924, 2240925 and 2240926. Selected bond lengths and angles were shown in Table S1 for CPs **1-3**. Hydrogen bonding interactions were listed in

Table S2.

### III. Luminescent sensing experiments

During the sensing experiments, CPs **1-3** (3 mg) were ground in the air, dispersed in 4 mL of water, and sonicated for 30 min to form a dispersed solution. Then, the analyte to be tested is added to the suspension to perform the fluorescence titration experiments, and the fluorescence intensity is detected by a fluorescence spectrometer. In the recycling experiment, the original fluorescence intensity of the samples was first tested, and then the analyte solution was added to record the fluorescence intensity. The samples at the end of the experiments were centrifuged, washed with ethanol, centrifuged again and dried, and then water was added to repeat the previous detection method for cyclic detection.

**Table S1.** Selected bond distances (Å) and angles (°) for CPs **1-3**.

| CP 1                |           |                       |            |
|---------------------|-----------|-----------------------|------------|
| Cd(1)-O(3)#1        | 2.221(2)  | N(1)-Cd(1)-O(4)#1     | 83.57(9)   |
| Cd(1)-O(4)#1        | 2.755(2)  | N(1)-Cd(1)-O(6)#2     | 83.44(10)  |
| Cd(1)-O(1)          | 2.186(2)  | N(1)-Cd(1)-O(5)#2     | 116.34(14) |
| Cd(1)-N(1)          | 2.284(3)  | O(6)#2-Cd(1)-O(4)#1   | 166.98(9)  |
| Cd(1)-O(6)#2        | 2.451(3)  | O(5)#2-Cd(1)-O(4)#1   | 135.24(9)  |
| Cd(1)-O(5)#2        | 2.304(3)  | O(5)#2-Cd(1)-O(6)#2   | 53.10(9)   |
| Cd(2)-O(2)W         | 2.267(3)  | O(2)W-Cd(2)-O(2)W#3   | 180.0      |
| Cd(2)-O(2)W#3       | 2.267(3)  | O(2)W-Cd(2)-O(1)W#3   | 91.06(11)  |
| Cd(2)-O(1)W#3       | 2.298(2)  | O(2)W-Cd(2)-O(1)W     | 88.94(11)  |
| Cd(2)-O(1)W         | 2.298(2)  | O(2)W#3-Cd(2)-O(1)W#3 | 88.94(11)  |
| Cd(2)-O(3)W         | 2.264(2)  | O(2)W#3-Cd(2)-O(1)W   | 91.06(11)  |
| Cd(2)-O(3)W#3       | 2.264(2)  | O(1)W-Cd(2)-O(1)W#3   | 180.0      |
| O(3)#1-Cd(1)-O(4)#1 | 51.17(7)  | O(3)W-Cd(2)-O(2)W#3   | 93.82(10)  |
| O(3)#1-Cd(1)-N(1)   | 111.61(9) | O(3)W-Cd(2)-O(2)W     | 86.18(10)  |
| O(3)#1-Cd(1)-O(6)#2 | 136.03(9) | O(3)W#3-Cd(2)-O(2)W#3 | 86.18(10)  |
| O(3)#1-Cd(1)-O(5)#2 | 84.11(9)  | O(3)W#3-Cd(2)-O(2)W   | 93.82(10)  |

|                   |            |                       |           |
|-------------------|------------|-----------------------|-----------|
| O(1)-Cd(1)-O(3)#1 | 122.59(9)  | O(3)W-Cd(2)-O(1)W#3   | 80.65(10) |
| O(1)-Cd(1)-O(4)#1 | 94.84(9)   | O(3)W#3-Cd(2)-O(1)    | 80.65(10) |
| O(1)-Cd(1)-N(1)   | 107.16(10) | O(3)W#3-Cd(2)-O(1)W#3 | 99.35(10) |
| O(1)-Cd(1)-O(6)#2 | 88.17(11)  | O(3)W-Cd(2)-O(1)W     | 99.35(10) |
| O(1)-Cd(1)-O(5)#2 | 114.11(14) | O(3)W#3-Cd(2)-O(3)W   | 180.0     |

Symmetry Code: #1 -X, -Y, 2-Z; #2 1-X, -Y, 2-Z; #3-X, 1-Y, -Z; #4-X, 2-Y, 1-Z

---

**CP 2**

---

|                   |           |                     |            |
|-------------------|-----------|---------------------|------------|
| Zn(1)-O(1)#2      | 1.984(3)  | O(1)#1-Zn(1)-N(1)#2 | 105.13(9)  |
| Zn(1)-O(2)        | 1.964(3)  | O(2)-Zn(1)-O(1)#1   | 103.90(13) |
| Zn(1)-N(1)#2      | 2.059(3)  | O(2)-Zn(1)-N(1)#2   | 107.74(8)  |
| Zn(1)-N(1)        | 2.059(3)  | O(2)-Zn(1)-N(1)     | 107.74(8)  |
| O(1)#1-Zn(1)-N(1) | 105.13(9) | N(1)#2-Zn(1)-N(1)   | 125.25(15) |

Symmetry Code: #1 +X, +Y, -1+Z; #2 +X, 1/2-Y, +Z; #3 +X, +Y, 1+Z; #4 3-X, 1-Y, -Z

---

**CP 3**

---

|                     |           |                       |            |
|---------------------|-----------|-----------------------|------------|
| Cd(1)-O(6)#1        | 2.212(18) | O(4)#2-Cd(1)-O(5)#1   | 167.28(7)  |
| Cd(1)-O(5)#1        | 2.711(2)  | N(1)-Cd(1)-O(5)#1     | 84.25(8)   |
| Cd(1)-O(1)          | 2.183(2)  | N(1)-Cd(1)-O(4)#2     | 83.07(8)   |
| Cd(1)-O(4)#2        | 2.456(2)  | N(1)-Cd(1)-O(3)#2     | 116.66(11) |
| Cd(1)-N(1)          | 2.274(2)  | O(3)#2-Cd(1)-O(5)#1   | 135.11(7)  |
| Cd(1)-O(3)#2        | 2.300(2)  | O(3)#2-Cd(1)-O(4)#2   | 53.24(8)   |
| Cd(2)-O(3)W         | 2.261(2)  | O(3)W-Cd(2)-O(3)W#3   | 180.0      |
| Cd(2)-O(3)W#3       | 2.261(2)  | O(3)W-Cd(2)-O(1)W     | 80.49(9)   |
| Cd(2)-O(1)W         | 2.280(2)  | O(3)W-Cd(2)-O(1)W#3   | 99.51(9)   |
| Cd(2)-O(1)W#3       | 2.280(2)  | O(3)W#3-Cd(2)-O(1)W#3 | 80.49(9)   |
| Cd(2)-O(2)W#3       | 2.266(2)  | O(3)W#3-Cd(2)-O(1)W   | 99.51(9)   |
| Cd(2)-O(2)W         | 2.266(2)  | O(3)W-Cd(2)-O(2)W     | 93.84(8)   |
| O(6)#1-Cd(1)-O(5)#1 | 51.63(6)  | O(3)W#3-Cd(2)-O(2)W   | 86.16(8)   |
| O(6)#1-Cd(1)-O(4)#2 | 135.70(8) | O(3)W#3-Cd(2)-O(2)W#3 | 93.83(8)   |
| O(6)#1-Cd(1)-N(1)   | 113.04(8) | O(3)W-Cd(2)-O(2)W#3   | 86.17(8)   |
| O(6)#1-Cd(1)-O(3)#2 | 83.53(8)  | O(1)W-Cd(2)-O(1)W#3   | 180.00(11) |

|                   |            |                       |          |
|-------------------|------------|-----------------------|----------|
| O(1)-Cd(1)-O(6)#1 | 122.42(8)  | O(2)W#3-Cd(2)-O(1)W   | 91.21(9) |
| O(1)-Cd(1)-O(5)#1 | 95.76(8)   | O(2)W-Cd(2)-O(1)W     | 88.79(9) |
| O(1)-Cd(1)-O(4)#2 | 87.20(9)   | O(2)W#3-Cd(2)-O(1)W#3 | 88.79(9) |
| O(1)-Cd(1)-N(1)   | 107.46(8)  | O(2)W-Cd(2)-O(1)W#3   | 91.21(9) |
| O(1)-Cd(1)-O(3)#2 | 112.60(11) | O(2)W#3-Cd(2)-O(2)W   | 180.0    |

Symmetry Code: #1 2-X, -Y, 2-Z; #2 1-X, -Y, 2-Z; #3 2-X, 1-Y, -Z; #4 2-X, 2-Y, 1-Z

**Table S2.** Selected hydrogen-bonding distances (Å) and angles (°) for CPs **1-3**.

| CP 1          |      |       |          |         |
|---------------|------|-------|----------|---------|
| D-H...A       | D-H  | H...A | D...A    | D-H...A |
| O2W-H2WB...O7 | 0.93 | 2.27  | 2.830(5) | 118     |
| CP 2          |      |       |          |         |
| D-H...A       | D-H  | H...A | D...A    | D-H...A |
| N2-H2...O7    | 0.86 | 2.06  | 2.728(7) | 134     |
| CP 3          |      |       |          |         |
| D-H...A       | D-H  | H...A | D...A    | D-H...A |
| O2W-H2WB...O7 | 0.89 | 1.88  | 2.702(3) | 153     |

## Section 2 Results discussion section

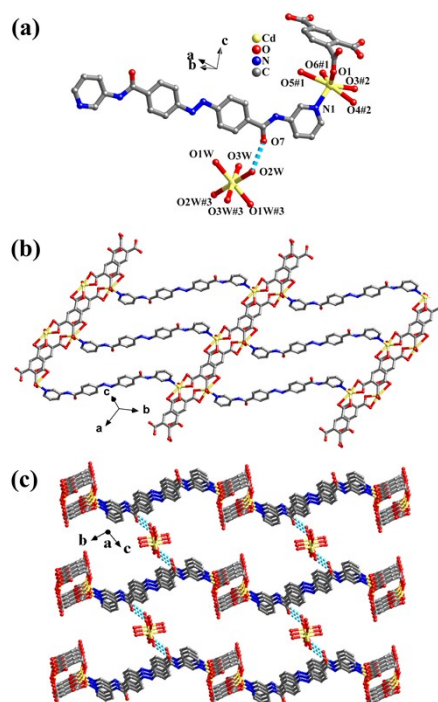

**Fig. S1** (a) The coordination environment of the  $\text{Cd}^{2+}$  ions in CP 3; (b) View of the 2D layer; (c) The 3D supramolecular framework of CP 3.

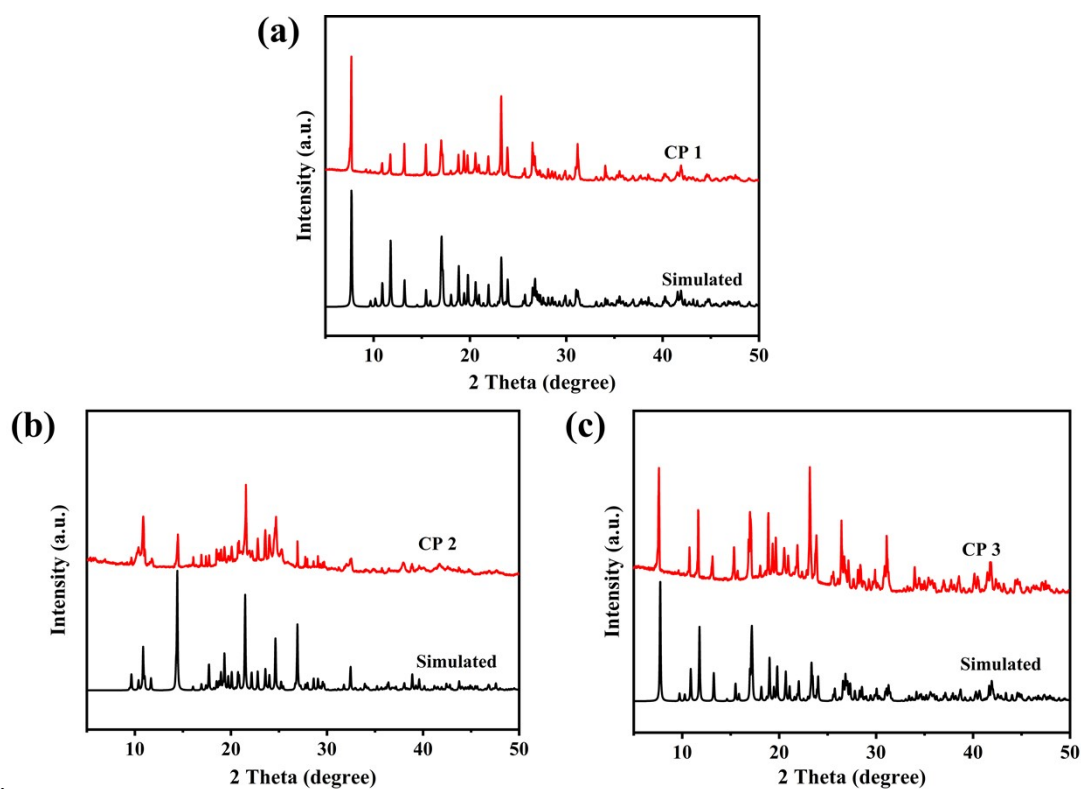

**Fig. S2** (a-c) The PXR D patterns of CPs 1-3.

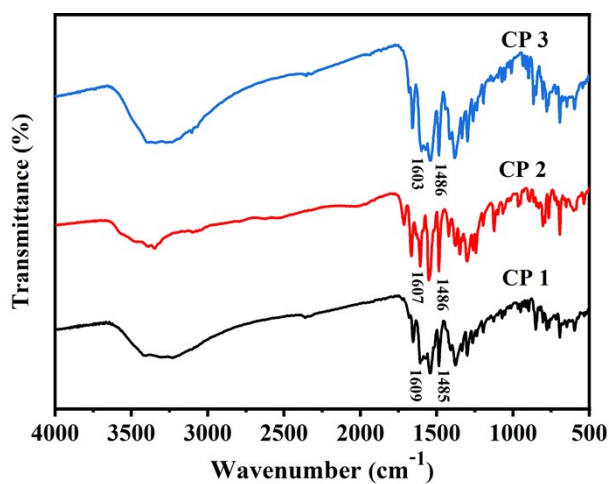

**Fig. S3** FT-IR spectra of CPs 1-3.

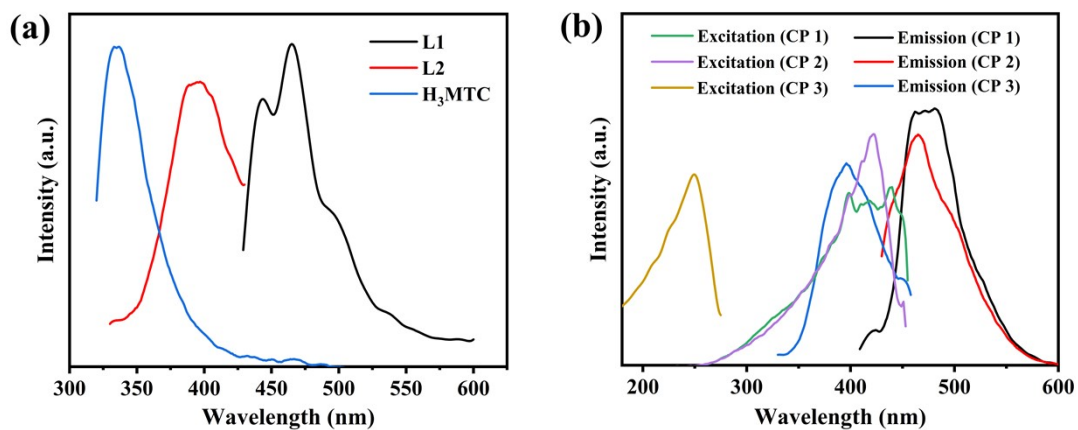

**Fig. S4** (a) The emission spectra of solid-state L1 and L2 ligands, and H<sub>3</sub>MTC; (b) The solid-state excitation and emission spectra of CPs 1-3.

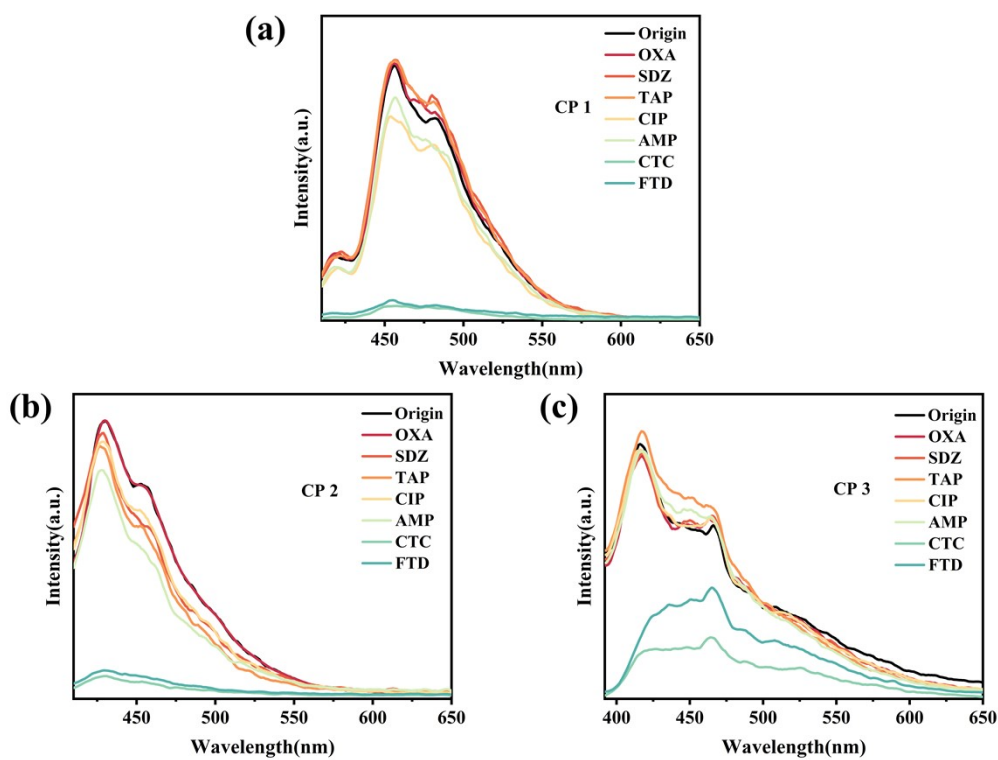

**Fig. S5** Sensing selectivity of antibiotics by CPs 1-3.

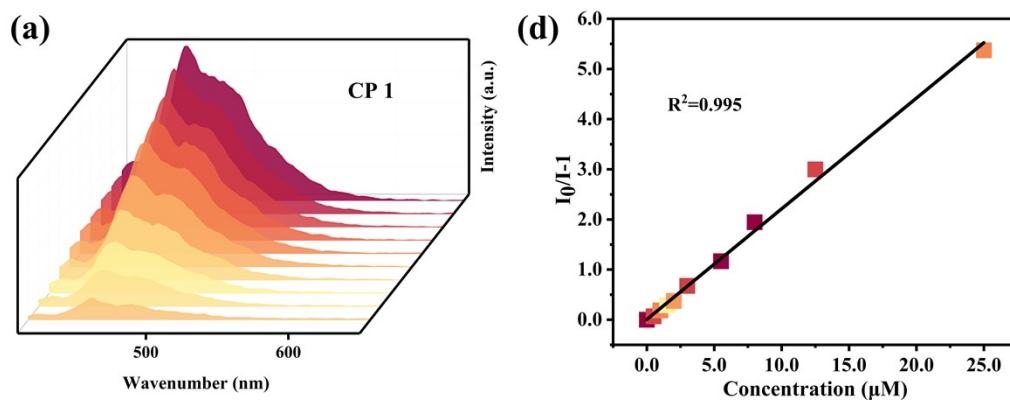

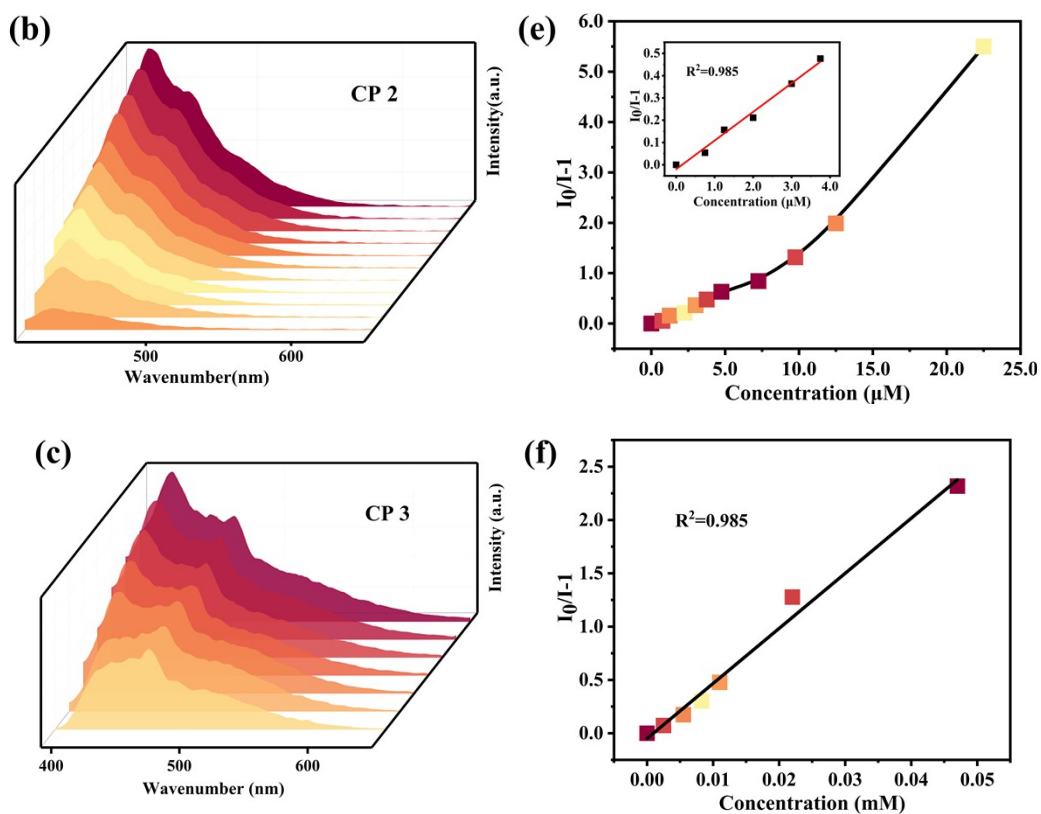

**Fig. S6** Emission fluorescence spectra of CP 1 (a); CP 2 (b); CP 3 (c) with the gradual addition of FTD aqueous solution of different volumes, respectively; S–V plots of CP 1 (d); CP 2 (e); CP 3 (f) with the addition of FTD aqueous solution.

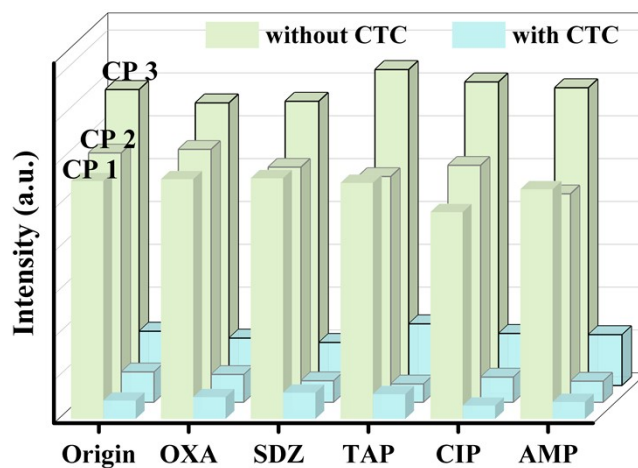

**Fig. S7** Fluorescence emission intensity of CPs 1-3 to other antibiotics without CTC and with CTC.

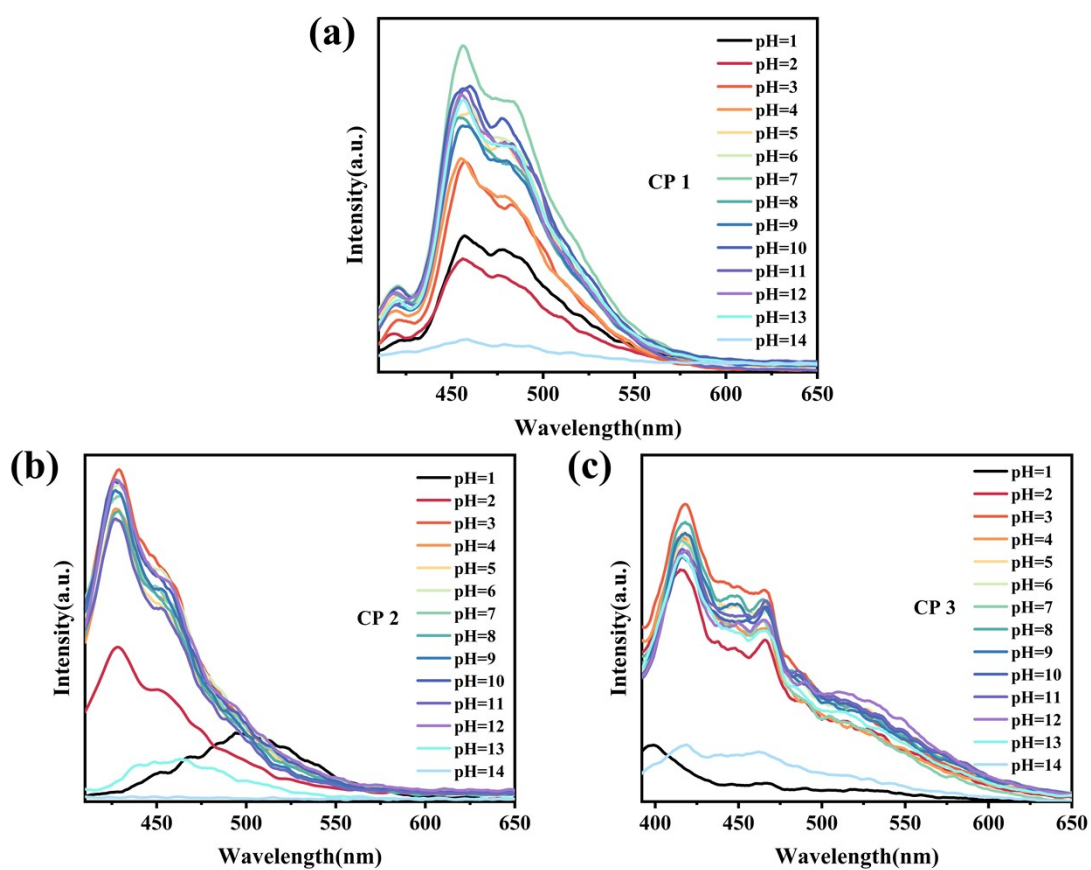

Fig. S8 Emission intensity of CPs 1-3 suspensions in different pH values.

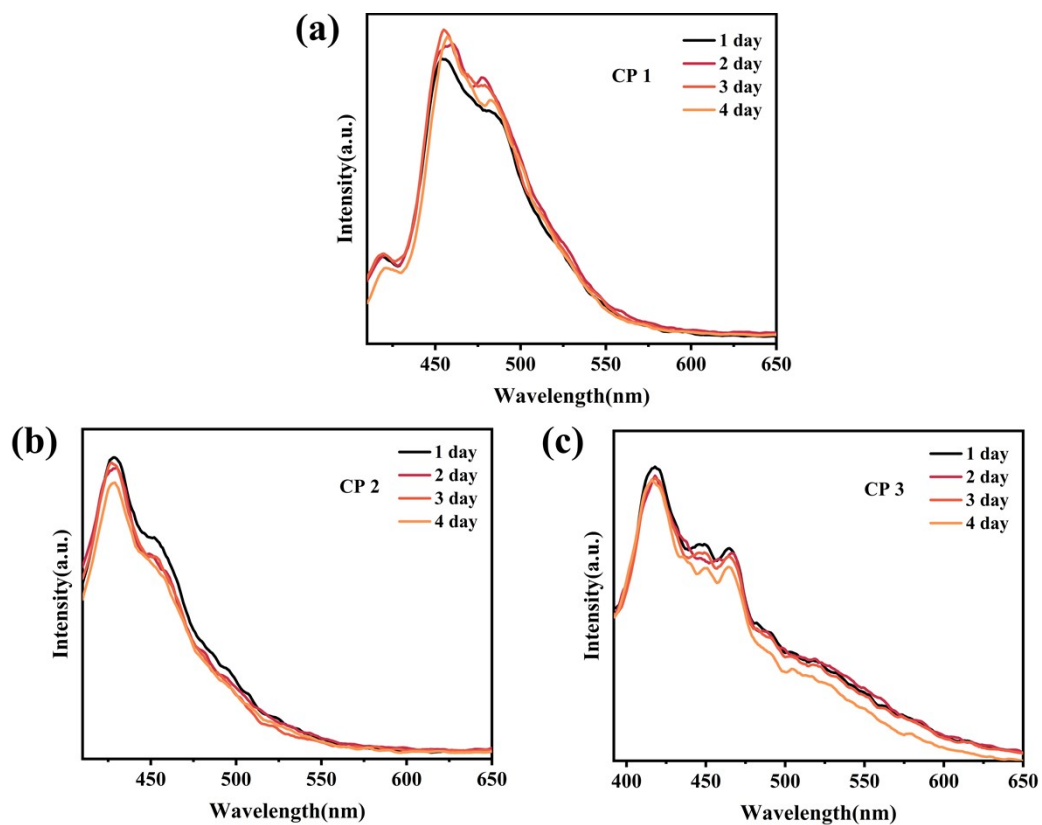

Fig. S9 Fluorescence intensity spectra of CPs 1-3 within four days.



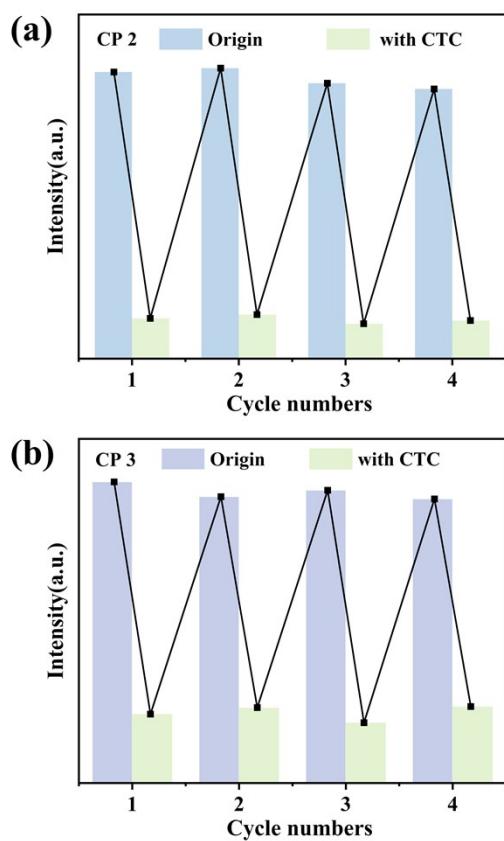

**Fig. S10** Reproducibility of the fluorescence intensity of CP 2 (a); CP 3 (b) with four cycles.

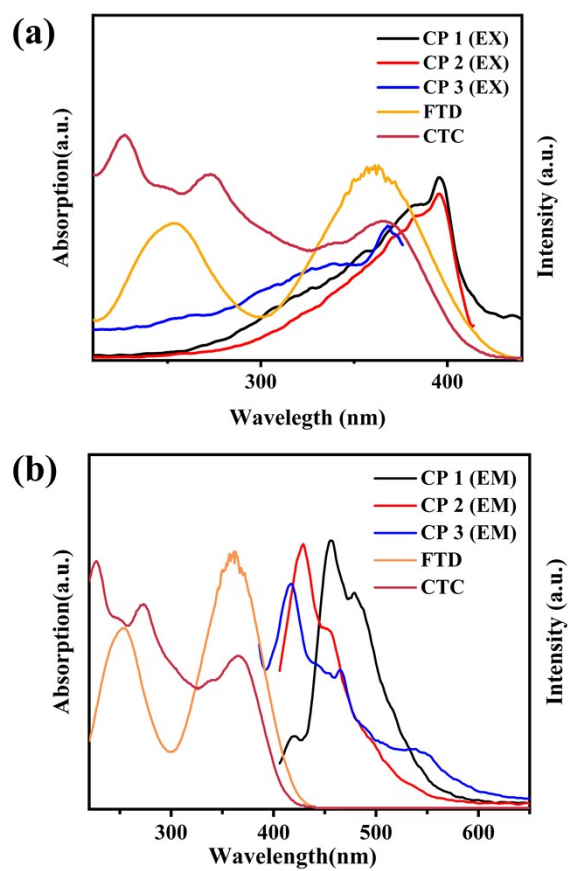

**Fig. S11** The UV-vis absorption spectra of FTD and CTC, and excitation (a); emission (b) spectra of CPs 1-3.

**Table S3** Comparison of the LODs for CTC and FTD using different methods.

| Methods/Sensors | Analyte  | LOD                   | References                  |
|-----------------|----------|-----------------------|-----------------------------|
| HPLC            | CTC      | $6.93 \times 10^{-6}$ | Du et al. <sup>2</sup>      |
| CuNCs@His       | CTC      | $8.76 \times 10^{-7}$ | Wang et al. <sup>3</sup>    |
| OVA-AuNCs       | CTC      | $1.88 \times 10^{-7}$ | Zhang et al. <sup>4</sup>   |
| ELISA/ICA       | CTC      | $1.20 \times 10^{-7}$ | Long et al. <sup>5</sup>    |
| CdTe QDs@ZIF-8  | CTC      | $3.70 \times 10^{-8}$ | Yang et al. <sup>6</sup>    |
| Fluorescence    | CTC (AM) | $4.48 \times 10^{-7}$ | Liu et al. <sup>7</sup>     |
| Fluorescence    | CTC (AM) | $6.23 \times 10^{-8}$ | Liu et al. <sup>7</sup>     |
| HPLC            | FTD      | 0.18 ng/g             | Díaz et al. <sup>8</sup>    |
| Fluorescence    | FTD      | $8.50 \times 10^{-8}$ | zhang et al. <sup>9</sup>   |
| ELISA           | FTD      | 4 ppb                 | Jester et al. <sup>10</sup> |
| CP 1            | CTC      | $5.12 \times 10^{-8}$ | Present work                |
| CP 1            | FTD      | $9.41 \times 10^{-8}$ | Present work                |
| CP 2            | CTC      | $1.04 \times 10^{-7}$ | Present work                |
| CP 2            | FTD      | $1.81 \times 10^{-7}$ | Present work                |
| CP 3            | CTC      | $8.04 \times 10^{-7}$ | Present work                |
| CP 3            | FTD      | $3.83 \times 10^{-7}$ | Present work                |

## References

1. G. Sheldrick, *Acta Crystallographica Section A*, 2008, **64**, 112-122.
2. F. Y. Du, X. Zheng, L. Sun, Q. Qin, L. Guo and G. H. Ruan, *J. Sep. Sci.*, 2015, **38**, 3774-3780.
3. X. S. Wang and S. Zhang, *Spectrochimica Acta Part A: Molecular and Biomolecular Spectroscopy*, 2022, **281**, 121588.
4. F. Y. Zhang, M. X. Liu, R. B. Liu, J. Li, Y. X. Sang, Y. W. Tang, X. H. Wang and S. Wang, *Biosens. Bioelectron.*, 2021, **171**, 112701.
5. C. J. Long, B. Y. Deng, S. J. Sun and S. Meng, *Food Addit. Contam. Part A*, 2017, **34**, 24-31.
6. W. K. Yang, X. Y. Zheng, F. Gao, H. H. Li, B. Fu, D. Y. Guo, F. X. Wang and Q. H. Pan, *Spectrochimica Acta Part A: Molecular and Biomolecular Spectroscopy*, 2022, **270**, 120785.
7. L. Liu, Q. Chen, J. Lv, Y. P. Li, K. C. Wang and J. R. Li, *Inorg. Chem.*, 2022, **61**, 8015-8021.
8. T. G. Díaz, A. G. Cabanillas, M. I. Acedo Valenzuela, C. A. Correa and F. Salinas, *J. Chromatogr. A*, 1997, **764**, 243-248.
9. S. Zhang, M. L. Jin, Y. X. Gao, W. Q. Li, X. Y. Wang, X. X. Li, J. Q. Qiao and Y. Peng, *Chem. Pap.*, 2022, **76**, 7855-7863.
10. E. L. E. Jester, A. Abraham, Y. S. Wang, K. R. El Said and S. M. Plakas, *Food Chem.*, 2014, **145**, 593-598.
